# Supplementary material for: Genotyping of high-risk anal human papillomavirus (HPV): ion torrent-next generation sequencing vs. linear array
Source: Virol J. 2017 Jun 13;14:112. doi: 10.1186/s12985-017-0771-z (PMC5470268; doi:10.1186/s12985-017-0771-z)
Supplement: Additional file 1: — The tabular data used in the analyses for this manuscript is included as an excel file. This data includes both the LA and NGS results for each of the types detected on the 10 samples. (XLS 57 kb) [file 12985_2017_771_MOESM1_ESM.xls]

## Sheet: Sheet1
sample	sample for figure	HPVtypes	LA	Ion	inLA	hrhpv	lrhpv
rgn-1-6	1	6	1	1	1	0	1
rgn-1-6	1	11	0	0	1	0	1
rgn-1-6	1	16	1	1	1	1	0
rgn-1-6	1	18	0	0	1	1	0
rgn-1-6	1	26	0	0	1	0	1
rgn-1-6	1	31	0	0	1	1	0
rgn-1-6	1	33	0	0	1	1	0
rgn-1-6	1	35	1	1	1	1	0
rgn-1-6	1	39	1	1	1	1	0
rgn-1-6	1	40	0	0	1	0	1
rgn-1-6	1	42	0	0	1	0	1
rgn-1-6	1	45	0	0	1	1	0
rgn-1-6	1	51	0	0	1	1	0
rgn-1-6	1	52	0	1	1	1	0
rgn-1-6	1	53	0	0	1	0	1
rgn-1-6	1	54	0	1	1	0	1
rgn-1-6	1	55	0	0	1	0	1
rgn-1-6	1	56	0	0	1	1	0
rgn-1-6	1	58	1	1	1	1	0
rgn-1-6	1	59	1	1	1	1	0
rgn-1-6	1	61	0	0	1	0	1
rgn-1-6	1	62	0	0	1	0	1
rgn-1-6	1	64	0	0	1	0	1
rgn-1-6	1	66	0	0	1	0	1
rgn-1-6	1	67	0	0	1	0	1
rgn-1-6	1	68	0	0	1	1	0
rgn-1-6	1	69	0	0	1	0	1
rgn-1-6	1	70	0	0	1	0	1
rgn-1-6	1	71	0	0	1	0	1
rgn-1-6	1	72	0	0	1	0	1
rgn-1-6	1	73	0	0	1	0	1
rgn-1-6	1	81	0	0	1	0	1
rgn-1-6	1	82	0	0	1	0	1
rgn-1-6	1	82.1	0	0	1	0	1
rgn-1-6	1	83	0	0	1	0	1
rgn-1-6	1	84	0	0	1	0	1
rgn-1-6	1	89	1	0	1	0	1
rgn-1-13	2	6	1	1	1	0	1
rgn-1-13	2	11	0	0	1	0	1
rgn-1-13	2	16	0	0	1	1	0
rgn-1-13	2	18	0	0	1	1	0
rgn-1-13	2	26	0	0	1	0	1
rgn-1-13	2	31	1	1	1	1	0
rgn-1-13	2	33	0	0	1	1	0
rgn-1-13	2	35	0	0	1	1	0
rgn-1-13	2	39	1	1	1	1	0
rgn-1-13	2	40	0	0	1	0	1
rgn-1-13	2	42	0	1	1	0	1
rgn-1-13	2	44	0	1	0	0	1
rgn-1-13	2	45	0	1	1	1	0
rgn-1-13	2	51	1	1	1	1	0
rgn-1-13	2	52	0	0	1	1	0
rgn-1-13	2	53	0	0	1	0	1
rgn-1-13	2	54	0	0	1	0	1
rgn-1-13	2	55	1	0	1	0	1
rgn-1-13	2	56	1	1	1	1	0
rgn-1-13	2	58	1	1	1	1	0
rgn-1-13	2	59	1	1	1	1	0
rgn-1-13	2	61	0	0	1	0	1
rgn-1-13	2	62	0	0	1	0	1
rgn-1-13	2	64	0	0	1	0	1
rgn-1-13	2	66	0	0	1	0	1
rgn-1-13	2	67	0	0	1	0	1
rgn-1-13	2	68	1	1	1	1	0
rgn-1-13	2	69	0	0	1	0	1
rgn-1-13	2	70	0	0	1	0	1
rgn-1-13	2	71	0	0	1	0	1
rgn-1-13	2	72	0	0	1	0	1
rgn-1-13	2	73	0	0	1	0	1
rgn-1-13	2	81	0	0	1	0	1
rgn-1-13	2	82	0	0	1	0	1
rgn-1-13	2	82.1	0	0	1	0	1
rgn-1-13	2	83	0	0	1	0	1
rgn-1-13	2	84	1	0	1	0	1
rgn-1-13	2	86	0	1	0	0	1
rgn-1-13	2	89	1	0	1	0	1
rgn-1-13	2	91	0	1	0	0	1
rgn-2-1	3	6	1	0	1	0	1
rgn-2-1	3	11	0	0	1	0	1
rgn-2-1	3	16	0	0	1	1	0
rgn-2-1	3	18	0	0	1	1	0
rgn-2-1	3	26	0	0	1	0	1
rgn-2-1	3	31	0	0	1	1	0
rgn-2-1	3	33	1	1	1	1	0
rgn-2-1	3	35	1	1	1	1	0
rgn-2-1	3	39	1	1	1	1	0
rgn-2-1	3	40	0	0	1	0	1
rgn-2-1	3	42	0	0	1	0	1
rgn-2-1	3	45	0	0	1	1	0
rgn-2-1	3	51	0	0	1	1	0
rgn-2-1	3	52	0	0	1	1	0
rgn-2-1	3	53	0	0	1	0	1
rgn-2-1	3	54	0	0	1	0	1
rgn-2-1	3	55	0	0	1	0	1
rgn-2-1	3	56	1	1	1	1	0
rgn-2-1	3	58	1	1	1	1	0
rgn-2-1	3	59	0	0	1	1	0
rgn-2-1	3	61	0	0	1	0	1
rgn-2-1	3	62	0	0	1	0	1
rgn-2-1	3	64	0	0	1	0	1
rgn-2-1	3	66	1	0	1	0	1
rgn-2-1	3	67	0	1	1	0	1
rgn-2-1	3	68	0	0	1	1	0
rgn-2-1	3	69	0	0	1	0	1
rgn-2-1	3	70	0	0	1	0	1
rgn-2-1	3	71	0	0	1	0	1
rgn-2-1	3	72	0	0	1	0	1
rgn-2-1	3	73	1	0	1	0	1
rgn-2-1	3	81	0	0	1	0	1
rgn-2-1	3	82	1	1	1	0	1
rgn-2-1	3	82.1	0	0	1	0	1
rgn-2-1	3	83	0	0	1	0	1
rgn-2-1	3	84	0	0	1	0	1
rgn-2-1	3	89	0	0	1	0	1
rgn-2-10	4	6	1	1	1	0	1
rgn-2-10	4	11	0	0	1	0	1
rgn-2-10	4	16	1	1	1	1	0
rgn-2-10	4	18	1	1	1	1	0
rgn-2-10	4	26	0	0	1	0	1
rgn-2-10	4	31	0	0	1	1	0
rgn-2-10	4	33	0	0	1	1	0
rgn-2-10	4	35	0	0	1	1	0
rgn-2-10	4	39	0	0	1	1	0
rgn-2-10	4	40	1	1	1	0	1
rgn-2-10	4	42	0	0	1	0	1
rgn-2-10	4	43	0	1	0	0	1
rgn-2-10	4	45	1	1	1	1	0
rgn-2-10	4	51	1	1	1	1	0
rgn-2-10	4	52	0	1	1	1	0
rgn-2-10	4	53	0	0	1	0	1
rgn-2-10	4	54	1	1	1	0	1
rgn-2-10	4	55	0	0	1	0	1
rgn-2-10	4	56	0	0	1	1	0
rgn-2-10	4	58	1	1	1	1	0
rgn-2-10	4	59	1	0	1	1	0
rgn-2-10	4	61	0	0	1	0	1
rgn-2-10	4	62	0	0	1	0	1
rgn-2-10	4	64	0	0	1	0	1
rgn-2-10	4	66	0	0	1	0	1
rgn-2-10	4	67	0	0	1	0	1
rgn-2-10	4	68	0	1	1	1	0
rgn-2-10	4	69	0	0	1	0	1
rgn-2-10	4	70	0	0	1	0	1
rgn-2-10	4	71	0	0	1	0	1
rgn-2-10	4	72	0	0	1	0	1
rgn-2-10	4	73	0	0	1	0	1
rgn-2-10	4	81	1	1	1	0	1
rgn-2-10	4	82	0	0	1	0	1
rgn-2-10	4	82.1	0	0	1	0	1
rgn-2-10	4	83	0	0	1	0	1
rgn-2-10	4	84	0	0	1	0	1
rgn-2-10	4	89	0	0	1	0	1
rgn-4-5	5	6	0	0	1	0	1
rgn-4-5	5	11	0	0	1	0	1
rgn-4-5	5	16	0	0	1	1	0
rgn-4-5	5	18	0	0	1	1	0
rgn-4-5	5	26	0	0	1	0	1
rgn-4-5	5	30	0	1	0	0	1
rgn-4-5	5	31	1	1	1	1	0
rgn-4-5	5	33	0	0	1	1	0
rgn-4-5	5	35	1	1	1	1	0
rgn-4-5	5	39	1	1	1	1	0
rgn-4-5	5	40	0	0	1	0	1
rgn-4-5	5	42	0	0	1	0	1
rgn-4-5	5	45	0	0	1	1	0
rgn-4-5	5	51	1	1	1	1	0
rgn-4-5	5	52	0	1	1	1	0
rgn-4-5	5	53	0	0	1	0	1
rgn-4-5	5	54	0	0	1	0	1
rgn-4-5	5	55	0	0	1	0	1
rgn-4-5	5	56	1	1	1	1	0
rgn-4-5	5	58	1	1	1	1	0
rgn-4-5	5	59	0	0	1	1	0
rgn-4-5	5	61	0	0	1	0	1
rgn-4-5	5	62	0	0	1	0	1
rgn-4-5	5	64	0	0	1	0	1
rgn-4-5	5	66	1	1	1	0	1
rgn-4-5	5	67	0	1	1	0	1
rgn-4-5	5	68	1	1	1	1	0
rgn-4-5	5	69	0	0	1	0	1
rgn-4-5	5	70	0	0	1	0	1
rgn-4-5	5	71	0	0	1	0	1
rgn-4-5	5	72	0	0	1	0	1
rgn-4-5	5	73	0	0	1	0	1
rgn-4-5	5	81	0	0	1	0	1
rgn-4-5	5	82	0	0	1	0	1
rgn-4-5	5	82.1	0	0	1	0	1
rgn-4-5	5	83	1	1	1	0	1
rgn-4-5	5	84	0	0	1	0	1
rgn-4-5	5	89	0	0	1	0	1
rgn-4-6	6	6	0	0	1	0	1
rgn-4-6	6	11	1	1	1	0	1
rgn-4-6	6	16	0	1	1	1	0
rgn-4-6	6	18	0	0	1	1	0
rgn-4-6	6	26	0	0	1	0	1
rgn-4-6	6	31	1	1	1	1	0
rgn-4-6	6	33	0	0	1	1	0
rgn-4-6	6	35	1	1	1	1	0
rgn-4-6	6	39	1	1	1	1	0
rgn-4-6	6	40	0	1	1	0	1
rgn-4-6	6	42	0	0	1	0	1
rgn-4-6	6	45	1	1	1	1	0
rgn-4-6	6	51	0	0	1	1	0
rgn-4-6	6	52	0	0	1	1	0
rgn-4-6	6	53	0	0	1	0	1
rgn-4-6	6	54	1	1	1	0	1
rgn-4-6	6	55	0	0	1	0	1
rgn-4-6	6	56	1	1	1	1	0
rgn-4-6	6	58	0	1	1	1	0
rgn-4-6	6	59	0	0	1	1	0
rgn-4-6	6	61	1	1	1	0	1
rgn-4-6	6	62	1	1	1	0	1
rgn-4-6	6	64	0	0	1	0	1
rgn-4-6	6	66	0	0	1	0	1
rgn-4-6	6	67	0	0	1	0	1
rgn-4-6	6	68	0	0	1	1	0
rgn-4-6	6	69	0	0	1	0	1
rgn-4-6	6	70	0	0	1	0	1
rgn-4-6	6	71	0	0	1	0	1
rgn-4-6	6	72	0	0	1	0	1
rgn-4-6	6	73	0	0	1	0	1
rgn-4-6	6	81	0	0	1	0	1
rgn-4-6	6	82	0	0	1	0	1
rgn-4-6	6	82.1	0	0	1	0	1
rgn-4-6	6	83	1	1	1	0	1
rgn-4-6	6	84	1	0	1	0	1
rgn-4-6	6	89	0	0	1	0	1
rgn-4-6	6	91	0	1	0	0	1
rgn-4-11	7	6	1	1	1	0	1
rgn-4-11	7	11	0	0	1	0	1
rgn-4-11	7	16	0	0	1	1	0
rgn-4-11	7	18	1	1	1	1	0
rgn-4-11	7	26	0	0	1	0	1
rgn-4-11	7	31	1	0	1	1	0
rgn-4-11	7	32	0	1	0	0	1
rgn-4-11	7	33	0	0	1	1	0
rgn-4-11	7	35	1	1	1	1	0
rgn-4-11	7	39	1	1	1	1	0
rgn-4-11	7	40	0	0	1	0	1
rgn-4-11	7	42	1	1	1	0	1
rgn-4-11	7	45	1	1	1	1	0
rgn-4-11	7	51	0	0	1	1	0
rgn-4-11	7	52	0	0	1	1	0
rgn-4-11	7	53	0	0	1	0	1
rgn-4-11	7	54	0	0	1	0	1
rgn-4-11	7	55	1	0	1	0	1
rgn-4-11	7	56	0	0	1	1	0
rgn-4-11	7	58	0	0	1	1	0
rgn-4-11	7	59	1	1	1	1	0
rgn-4-11	7	61	0	0	1	0	1
rgn-4-11	7	62	0	0	1	0	1
rgn-4-11	7	64	0	0	1	0	1
rgn-4-11	7	66	0	0	1	0	1
rgn-4-11	7	67	0	0	1	0	1
rgn-4-11	7	68	0	0	1	1	0
rgn-4-11	7	69	0	0	1	0	1
rgn-4-11	7	70	0	0	1	0	1
rgn-4-11	7	71	0	0	1	0	1
rgn-4-11	7	72	0	0	1	0	1
rgn-4-11	7	73	0	0	1	0	1
rgn-4-11	7	74	0	1	0	0	1
rgn-4-11	7	81	0	0	1	0	1
rgn-4-11	7	82	0	0	1	0	1
rgn-4-11	7	82.1	0	0	1	0	1
rgn-4-11	7	83	0	0	1	0	1
rgn-4-11	7	84	0	0	1	0	1
rgn-4-11	7	86	0	1	0	0	1
rgn-4-11	7	87	0	1	0	0	1
rgn-4-11	7	89	0	0	1	0	1
rgn-4-11	7	90	0	1	0	0	1
rgn-4-11	7	114	0	1	0	0	1
rgn-5-4	8	6	0	0	1	0	1
rgn-5-4	8	11	1	1	1	0	1
rgn-5-4	8	16	1	1	1	1	0
rgn-5-4	8	18	1	1	1	1	0
rgn-5-4	8	26	1	1	1	0	1
rgn-5-4	8	31	0	0	1	1	0
rgn-5-4	8	33	0	0	1	1	0
rgn-5-4	8	35	0	0	1	1	0
rgn-5-4	8	38	0	1	0	0	1
rgn-5-4	8	39	0	0	1	1	0
rgn-5-4	8	40	0	0	1	0	1
rgn-5-4	8	42	0	0	1	0	1
rgn-5-4	8	44	0	1	0	0	1
rgn-5-4	8	45	1	1	1	1	0
rgn-5-4	8	51	1	1	1	1	0
rgn-5-4	8	52	1	1	1	1	0
rgn-5-4	8	53	0	0	1	0	1
rgn-5-4	8	54	0	0	1	0	1
rgn-5-4	8	55	0	0	1	0	1
rgn-5-4	8	56	0	0	1	1	0
rgn-5-4	8	58	0	0	1	1	0
rgn-5-4	8	59	1	0	1	1	0
rgn-5-4	8	61	0	0	1	0	1
rgn-5-4	8	62	0	0	1	0	1
rgn-5-4	8	64	0	0	1	0	1
rgn-5-4	8	66	1	0	1	0	1
rgn-5-4	8	67	0	0	1	0	1
rgn-5-4	8	68	0	0	1	1	0
rgn-5-4	8	69	0	0	1	0	1
rgn-5-4	8	70	0	0	1	0	1
rgn-5-4	8	71	0	0	1	0	1
rgn-5-4	8	72	0	0	1	0	1
rgn-5-4	8	73	0	0	1	0	1
rgn-5-4	8	81	0	0	1	0	1
rgn-5-4	8	82	1	1	1	0	1
rgn-5-4	8	82.1	0	0	1	0	1
rgn-5-4	8	83	0	0	1	0	1
rgn-5-4	8	84	0	0	1	0	1
rgn-5-4	8	89	0	0	1	0	1
rgn-7-1	9	6	0	0	1	0	1
rgn-7-1	9	11	1	1	1	0	1
rgn-7-1	9	16	1	1	1	1	0
rgn-7-1	9	18	0	0	1	1	0
rgn-7-1	9	26	0	0	1	0	1
rgn-7-1	9	30	0	1	0	0	1
rgn-7-1	9	31	0	0	1	1	0
rgn-7-1	9	33	0	0	1	1	0
rgn-7-1	9	35	1	1	1	1	0
rgn-7-1	9	39	0	1	1	1	0
rgn-7-1	9	40	0	0	1	0	1
rgn-7-1	9	42	0	0	1	0	1
rgn-7-1	9	45	1	1	1	1	0
rgn-7-1	9	51	0	1	1	1	0
rgn-7-1	9	52	0	1	1	1	0
rgn-7-1	9	53	1	0	1	0	1
rgn-7-1	9	54	0	0	1	0	1
rgn-7-1	9	55	0	0	1	0	1
rgn-7-1	9	56	1	1	1	1	0
rgn-7-1	9	58	1	1	1	1	0
rgn-7-1	9	59	0	0	1	1	0
rgn-7-1	9	61	0	0	1	0	1
rgn-7-1	9	62	0	0	1	0	1
rgn-7-1	9	64	0	0	1	0	1
rgn-7-1	9	66	0	0	1	0	1
rgn-7-1	9	67	0	1	1	0	1
rgn-7-1	9	68	0	0	1	1	0
rgn-7-1	9	69	0	0	1	0	1
rgn-7-1	9	70	0	0	1	0	1
rgn-7-1	9	71	0	0	1	0	1
rgn-7-1	9	72	0	0	1	0	1
rgn-7-1	9	73	0	0	1	0	1
rgn-7-1	9	74	0	1	0	0	1
rgn-7-1	9	81	0	0	1	0	1
rgn-7-1	9	82	0	1	1	0	1
rgn-7-1	9	82.1	1	0	1	0	1
rgn-7-1	9	83	1	1	1	0	1
rgn-7-1	9	84	1	0	1	0	1
rgn-7-1	9	89	1	0	1	0	1
rgn-9-9	10	6	1	1	1	0	1
rgn-9-9	10	11	0	0	1	0	1
rgn-9-9	10	16	0	0	1	1	0
rgn-9-9	10	18	1	1	1	1	0
rgn-9-9	10	26	0	0	1	0	1
rgn-9-9	10	31	1	1	1	1	0
rgn-9-9	10	33	0	0	1	1	0
rgn-9-9	10	35	0	0	1	1	0
rgn-9-9	10	39	1	1	1	1	0
rgn-9-9	10	40	0	0	1	0	1
rgn-9-9	10	42	0	0	1	0	1
rgn-9-9	10	45	1	1	1	1	0
rgn-9-9	10	51	1	1	1	1	0
rgn-9-9	10	52	0	0	1	1	0
rgn-9-9	10	53	0	0	1	0	1
rgn-9-9	10	54	0	0	1	0	1
rgn-9-9	10	55	0	0	1	0	1
rgn-9-9	10	56	1	1	1	1	0
rgn-9-9	10	58	0	0	1	1	0
rgn-9-9	10	59	1	0	1	1	0
rgn-9-9	10	61	1	0	1	0	1
rgn-9-9	10	62	0	0	1	0	1
rgn-9-9	10	64	0	0	1	0	1
rgn-9-9	10	66	0	0	1	0	1
rgn-9-9	10	67	0	1	1	0	1
rgn-9-9	10	68	0	0	1	1	0
rgn-9-9	10	69	0	0	1	0	1
rgn-9-9	10	70	0	0	1	0	1
rgn-9-9	10	71	0	0	1	0	1
rgn-9-9	10	72	0	0	1	0	1
rgn-9-9	10	73	0	0	1	0	1
rgn-9-9	10	81	0	0	1	0	1
rgn-9-9	10	82	0	0	1	0	1
rgn-9-9	10	82.1	0	0	1	0	1
rgn-9-9	10	83	0	0	1	0	1
rgn-9-9	10	84	1	0	1	0	1
rgn-9-9	10	89	1	0	1	0	1
